# Supplementary material
Source: HighWire-hosted journal article supplement (https://clinchem.aaccjnls.org/content/suppl/2011/05/13/clinchem.2010.160622)
Supplement: GuideSciWrit_Mar11_Esp_cxd.pdf [file GuideSciWrit_Mar11_Esp_cxd.pdf]

## Cómo escribir una Buena Crítica

Pamela A. Derish<sup>1\*</sup> and Thomas M. Annesley<sup>2</sup>

Las listas de datos de casi 7400 publicaciones científicas de la red de conocimiento Thomson Reuters (ISI). ¿Cuántos diarios lee con un fundamento regular? ¿Con cuántos temas puede mantenerse al tanto? Si su respuesta a cualquiera de las dos preguntas constaba de dígitos dobles, usted está mucho más allá que la mayoría de los científicos. La verdad es que el número de documentos publicados cada año es tan grande que nadie puede mantenerse al tanto con el ritmo de la ciencia. Incluso si usted quiere reunir conocimiento básico de un tema que no está dentro de su esfera inmediata de actividad, debe confiar en la mayoría de las categorías del sumario del documento que usted está llevando “al día” en el estado actual de una disciplina.

Este es el papel perfecto para una revisión de artículo. Las revisiones científicas de artículos analizan la información disponible sobre un tema particular. A diferencia de los artículos de investigación, los artículos de revisión no presentan datos nuevos. Su propósito es el evaluar y poner dentro de la perspectiva que ya es conocida. A diferencia de los artículos de investigación escritos en temas estrechamente definidos por una audiencia especializada de compañeros, los artículos de revisión examinan más a menudo los temas más amplios para una audiencia más general. Por ejemplo, una revisión de la matriz extracelular puede ser publicada en un diario cuyos lectores del tema, o este puede leerse por especialistas que necesitan mantenerse al día con los desarrollos en las subespecialidades relacionadas. Muchas revisiones, de cualquier modo, son escritas en temas estrechos. Por ejemplo, una revisión de los principios de la espectrometría de masa podría ser algo general, mientras que una revisión de espectrometría de masa en el laboratorio clínico podría ser más específica y una revisión del efecto de ionización en la espectrometría de masa podría ser incluso más específica.

Hay tres tipos principales de artículos de revisión. El más común, el que se discute en detalles en este trabajo, es la narrativa tradicional u opinión “académica” en la que el autor evalúa y sintetiza lo que se sabe sobre

un tema. El problema con las revisiones narrativas es que muchas son vagas y hasta excéntricas en la colección, la selección e interpretación de la información que se discute. A menudo, solo un selecto grupo de estudios es considerado (“cherry picking” recolección de cerezas), y la selección es probablemente sesgada. Dado que los artículos de revisión clínica se utilizan a menudo por los médicos como guías para la toma de decisiones, muchas revistas publican un segundo tipo, la revisión sistemática. Estos exámenes utilizan métodos explícitos y rigurosos para identificar, evaluar críticamente y sintetizar todos los estudios pertinentes a fin de presentar un resumen conciso de la mejor evidencia con respecto a una pregunta clínica bien definida (1–3). Un protocolo de revisión de la definición del diseño y métodos para una revisión sistemática -incluyendo cómo los estudios o ensayos serán identificados y los criterios de inclusión y exclusión- se escriben antes de que la revisión comience. Se establece un plan sistemático para ver que todos los estudios pertinentes, o ensayos (o al menos la mayor cantidad posible) se identifican e incluyen en cada análisis realizado. Una revisión sistemática no contiene necesariamente una síntesis estadística de los resultados de los estudios incluidos. Puede ser que el revisor encuentre que los diseños de los estudios identificados difieran también en gran medida para permitir que los estudios se combinen, por ejemplo, o que los resultados para cada estudio no se puedan combinar, debido a las diferencias en la forma en que se evaluaron. En tales casos el revisor sólo puede informar -como en una revisión académica de alta calidad- una evaluación bien razonada pero no estadística de lo que podría extraerse de la revisión acumulativa. El tercer tipo de artículo de revisión es el meta-análisis, que es una revisión sistemática que utiliza una técnica específica metodológica y estadística para combinar los datos cuantitativos de varios estudios independientes. Ya existen normas establecidas para la realización y la escritura de una revisión sistemática o meta-análisis (4, 5).

Los artículos de revisión científica son solicitados usualmente por editores de revistas cuando ellos sienten que algún aspecto de la disciplina de la revista ha enriquecido un punto al cual la investigación y los hallazgos en los estudios dispares necesitan de una evaluación crítica por una persona competente para hacer una evaluación exhaustiva de la obra, a separar el grano de la paja, para sintetizar las ideas y las conclusiones

<sup>1</sup> Department of Surgery, University of California, San Francisco, San Francisco, CA; <sup>2</sup> Department of Pathology, University of Michigan Health System, Ann Arbor, MI.

\* Dirigir correspondencia para este autor a: Department of Surgery, University of California, San Francisco, 1600 Divisadero St., Room C-322, San Francisco, CA 94143-1674. E-mail Pamela.Derish@ucsfmedctr.org.

Recibido para la publicación el 20 de Diciembre, del 2010. Aceptado para la publicación el 28 de Diciembre del 2010.

que el trabajo comprende, y para traer una perspectiva global para el campo o tema. Esa persona suele ser un científico muy conocido y respetado en el campo, aunque no necesariamente un “estadista”. Dependiendo del tema, la disciplina, y las circunstancias, los editores de revistas podrían invitar a una revisión de un investigador joven prometedor en el que el investigador más joven estima para ser más propenso a considerar la invitación de una oportunidad profesional valiosa, para ir más a fondo hasta la fecha en la literatura actual, y tener ideas frescas para contribuir a la disciplina.

De vez en cuando un científico puede concluir que un artículo de revisión en su disciplina es de mucho tiempo atrás. Si alguna vez ha sentido que sea el caso, es una buena idea revisar la información de la sección de autores de la revista que publique con más frecuencia artículos de revisión en su disciplina y, si las instrucciones no indican lo contrario, es bueno escribir una carta al editor. En dicho escrito se debe detallar por qué la revisión es necesaria en este momento y por qué usted es la persona que la escribe.

### Las Claves para Escribir una Buena Narrativa de un Artículo de Revisión

Los artículos de revisión bien concebidos a menudo responden a una pregunta específica, tales como ¿Qué sabemos (y no sabemos) acerca de la matriz extracelular? O: ¿Cómo son las metas relacionadas con el resultado de análisis de desempeño establecidos? O: ¿Cuáles son los problemas asociados con la espectrometría de masa clínica? Tanto el tema y el propósito de la revisión deben ser claros desde el principio, y se debe mantener a la audiencia prevista en cuanto a definir el propósito de la revisión.

Elaborar un plan o un esquema apropiado para el tema concreto del objeto de examen. Si lo hace, le ayudará a definir el alcance de la revisión, organizar las secciones en un orden lógico, y evitar las lagunas y despidos en su cobertura del tema. Una serie de subpartidas a continuación, se deben utilizar para hacer clara para el lector la estructura y organización de la revista.

Evaluar todos los datos y resultados de los estudios publicados, sintetizan la evidencia en el argumento fundamental para apoyarlos. Muchos artículos de revisión narrativa simplemente recitan una letanía de nombres de autores y los resultados que da al lector son poco más que una versión ampliada de una búsqueda de base datos bibliográficos. Las claves para una buena revisión consistirán en lo siguiente: (a) la evaluación de la revisión exhaustiva y crítica de la literatura relevante a un tema tan importante; (b) su criterio para la selección y omisión de artículos a incluir en la revisión; (c) la síntesis de las ideas de otros investigadores que se han

generado en el campo; y (d) su perspectiva científica disciplinada-basada en la preponderancia de la evidencia sobre el estatus de la investigación y sus conclusiones, la investigación y la dirección que ahora debe tomar para avanzar en el conocimiento en el campo.

### La Estructura de una Revisión

A pesar de que un artículo de revisión no es un artículo de investigación, los mismos conceptos importantes que ayudan a crear un buen trabajo de investigación aún se aplican. El título debe describir claramente el tema y poner de relieve qué aspecto del tema se está cubriendo. Por ejemplo, el título de “Enfermedad de la Tiroides” es demasiado genérico, mientras que “Retos en el Diagnóstico de Enfermedad Tiroidea Subclínica” o “Desafíos en la Medición de Hormonas Tiroideas” serían mejores para describir la naturaleza específica de la revisión. El resumen debe valer por sí mismo e incluir, como mínimo, el tema o cuestión y la necesidad de una revisión, lo que se incluye en la revisión, y las conclusiones sobre el tema o el campo al final de la revisión. El resumen de los requisitos de contenido y el formato son diferentes, dependiendo del tipo de revisión y publicación, por lo que es importante consultar las instrucciones suministradas por la revista de su elección. Algunas revistas prefieren resúmenes no estructurados, mientras que otros requieren de resúmenes estructurados que contengan varios elementos. Por ejemplo *Clinical Chemistry* requiere un resumen estructurado con secciones etiquetadas como Antecedentes, Contenido y Resumen. Para artículos de revisión clínica, la *AMA Manual of Style (Manual de estilo AMA)* especifica las siguientes secciones: Contenido, Adquisición de Evidencia, Resultados y Conclusiones (6).

La Introducción debe de establecer el propósito de la revisión, por qué una revisión en el campo o tema es necesario en este momento, y qué es lo que va a cubrir usted, como se muestra a continuación en un ejemplo de una revisión en la simulación del cerebro profundo (DBS) por distonía (7):

*De cualquier modo, uno debe reconocer que los resultados publicados obtenidos con DBS en distonía son pocos y que las conclusiones desde estos reportes preliminares deben de elaborarse muy cuidadosamente. Sin embargo, los resultados son prometedores saliendo desde los informes en los casos individuales o en pequeñas series de casos, y la idea de que la estimulación cerebral profunda puede ser de gran ayuda en casos seleccionados es de crecimiento progresivo. . . . En esta revisión, discutimos los resultados reportados en la literatura. Algunos problemas críticos considerando que también se mencionan la evaluación de los resultados.*

Si usted ha hecho una revisión narrativa o una revisión sistemática, describa los métodos para y el ámbito de su literatura, busque por todos los reportes so-

bre el tema desde el la última revisión definitiva. En su descripción, incluya los términos clave usados para las investigaciones, el(los) lenguaje(s) de artículos buscados, los límites de la búsqueda (por ejemplo, años incluidos), las fuentes de referencias (por ejemplo, bases de datos computarizados, bases de datos anteriores en papel, reportes del gobierno). El ejemplo siguiente, de una revisión sobre morbilidad y mortalidad seguido de una palidotomía en la enfermedad de Parkinson (8), es justamente característica:

*Buscamos en la base de datos electrónica de MEDLINE artículos en inglés reportados entre Enero del 1992 y Diciembre del 2000 al usar la palabra clave "pallidotomy" (palidotomía). La lista de referencia de los artículos más relevantes fue escaneada para estudios adicionales.*

Describa el criterio de inclusión y exclusión para citar estudios y cómo este criterio fue establecido, como se ilustra en el mismo ejemplo (8):

*Seleccionamos estudios de acuerdo con el siguiente criterio: 1) reportaje de los datos clínicos en enfermedad de Parkinson (sin procedimientos radiológicos o notas técnicas), 2) reportaje de los datos originales (sin revisiones o notas editoriales), 3) descripción inequívoca de la morbilidad y la mortalidad, 4) y el reportaje de los casos consecutivos deseleccionados (no reportes de caso). Para estudios con sets de bases de datos superpuestos, escogimos la que es con la población más alta. En el caso de publicación dual, el estudio fue usado solo una vez.*

Ahora ya está listo para presentar el corazón de la revisión, que consta de los principales resultados o la información recopilada como parte de hacer la revisión y el comentario o la discusión que extrae la información en conjunto y ayuda a sacar conclusiones sobre el estado del campo. Esta sección se llama a veces "Resultados y Discusión", o "Resultados y Comentarios", pero a menudo comienza con un encabezado que indica el importante tema a tratar –por ejemplo, "Modos de Acción de los Inhibidores de la Proteasa"- seguido de los incisos (con sus apropiados subtítulos) que la revisión de los inhibidores específicos de la proteasa o las clases de ellas y clasificar las zonas de mayor comprensión y conocimiento desde la revisión final definitiva. Asegúrese de que el principio de la organización de su revisión sea explícita al establecer la secuencia en que los temas se discuten – por ejemplo, el orden cronológico, de general a lo particular, o de las más frecuentes a las más raras. Todas las cifras incluidas y tablas deben cumplir las mismas normas dadas para los trabajos de investigación.

Evaluar las cuestiones relacionadas con el tema, la calidad de la información disponible sobre el tema, los problemas que no se habían tratado, y las zonas de consenso o controversia. Para cada estudio, evaluar críticamente la información siguiente: (a) las conclusiones clave; (b) las limitaciones y/o déficit, en su caso;

(c) si los métodos son sólidos para evaluar la hipótesis, (d) si los resultados pueden obtenerse con los métodos y están justificados, (e) si la interpretación de los trabajos y las conclusiones correctas, y (f) la contribución relativa de los trabajos en el campo o tema que se revisó. Resumir y criticar los estudios que merecen especial atención, dar el crédito apropiado a los estudios que hicieron importantes contribuciones y los estudios que produjeron los hallazgos más significativos. Lo más importante, sintetizar y dar forma a las ideas que se han encontrado, como muestra este ejemplo<sup>3</sup> (9):

*A pesar de 30 años de investigación continua, el mecanismo preciso de pérdida de células-T CD4 inducida por la infección por VIH sigue siendo controvertido. La destrucción mediada por el VIH de su blanco preferido, las células CD4 de células-T activadas, es sin duda fundamental para la patogénesis del VIH, puede limitarse a reemplazar la pérdida de células.<sup>21,22</sup> Como propuso por primera vez en la década de 1990, 23 investigadores ahora saben que la naturaleza pro-inflamatorias de la infección por VIH es una parte clave de la patogénesis de la enfermedad.<sup>2,25</sup>*

La discusión de los retos actuales o perspectivas de futuro es la única zona que permite la subjetividad y opinión del autor si procede, también se puede considerar el impacto científico, económico y social de la obra reseñada, como en los ejemplos siguientes de 2 comentarios publicados en *Clinical Chemistry*. Esta es de la referencia (10):

*El método de oro para el análisis de 170HP, androstenediona y la testosterona es ampliamente considerado como la espectrometría líquida de cromatografía en tándem de masas (LC-MS/MS). LC-MS/MS ofrece excelente sensibilidad y especificada analítica en comparación con inmunoensayo, pero no deja de tener sus propios problemas. En particular, hay muy poca armonización de métodos entre los laboratorios que requieren intervalos de referencia específicos del sitio (31). Al igual que con la renina plasmática es importante que el mismo método y laboratorio sea utilizado en el tiempo para asegurar que los cambios observados reflejen cambios fisiológicos y no se deban a diferencias en el método. También es importante señalar que, aunque LC-MS/MS es altamente específico, no está libre de interferencias. EL uso de los rangos de iones es una herramienta importante para detectar posibles interferencias (31). Los métodos de la EM son cada vez más comunes en los laboratorios, y es de esperar que muchas instituciones se cambien al análisis LC-MS/MS basado en esteroides en un futuro próximo. Es fundamental que los químicos clínicos mantengan in-*

<sup>3</sup> Los números de referencia en los ejemplos no corresponden a cualquiera de las referencias reales en el artículo presentado.

formados a los médicos cuando se producen cambios en los métodos para asegurar la correcta interpretación de los resultados al seguimiento de los pacientes CAH.

Este ejemplo es de la referencia (11):

Los resultados de un análisis de costo-efectividad, sin embargo, dependen en gran medida del costo relativo de la prueba de CNH en comparación con la de eco cardiogramas, así como sobre la prevalencia de HF en la población estudiada. Desafortunadamente, estos factores pueden variar considerablemente entre los departamentos, los países y los sistemas de salud, por lo tanto, probablemente sea necesario que cada laboratorio o departamento clínico analice la relación costo-efectividad en su marco económico propio. Además, el análisis costo-efectividad también depende de la sensibilidad de la prueba de CNH para detectar la IC. El Costo-efectividad mejorará si hay más pruebas específicas se utilizan: esto disminuiría el número de personas con falsos positivos (FP) en los resultados y, en consecuencia, el número de nuevas investigaciones inútiles.

Finalice su revisión con un breve párrafo o sección conclusión de que le da al lector un sentido de “lo que todos los medio” o de “lo que nos depara el futuro”, como se muestra con dos ejemplos. Esta es de la referencia (12):

¿La cuantificación basa en MS sustituirá ELISAs? Según un informe reciente de la Clinical Chemistry, el consenso entre los expertos es que ELISA es probable que no se sustituya por métodos basados en la clínica, sino que servirá en concierto con los inmunoensayos para la cuantificación de ciertas proteínas, en particular, aquellos para los que las pruebas ELISA de buena calidad no existen, o aquellos para los que la cuantificación de las isoformas o modificaciones postraduccionales se requieren (65). En la actualidad, los métodos de MS-basados en LOQs faltan a una cuantificación fiable en los rangos necesarios para los estudios de biomarcadores sin estar junto con el enriquecimiento anteriormente, el agotamiento y fraccionamiento, como se describe en esta revisión. Sin embargo, estos métodos también tienen sus limitaciones, y una solución más significativa para aliviar el cuello de botella en la tubería de biomarcadores probablemente se producirá a partir de los avances en la preparación de muestras automáticas, la limpieza, y en la línea de fraccionamiento, así como las mejoras en la precisión de la masa y poder de resolución de los analizadores de masas por sí mismos.

Esta conclusión es de la referencia (13):

Los estudios futuros de evaluación de nuevos biomarcadores de golpe deben responder a las preguntas que se ocupan de su contribución clínica única en el diagnóstico, administración, y predicción del riesgo de accidente cerebro vascular: ¿ha tenido el paciente un accidente cerebro-vascular? ¿Es la carrera de etiología isquémica o hemorrágica? ¿Son los síntomas sugestivos de una investigación adicional intensiva o de una terapia

trombolítica? ¿Está en riesgo el paciente de un accidente cerebro vascular o una recurrencia de eventos cardiovasculares? Los diagnósticos recientes siguen siendo muy dependientes de la interpretación clínica, y aún más de los esfuerzos de investigación traslacional hacia el descubrimiento de biomarcadores de golpe tengan la posibilidad de mejorar considerablemente los resultados del paciente y la calidad de la atención.

## Pensamientos Finales

Un trabajo de investigación bien escrito cuenta una historia, respondiendo a preguntas importantes: ¿Por qué es importante el tema? ¿Qué falta de conocimientos o que controversia existe? ¿Cómo puedo realizar el estudio? ¿Qué encontré? ¿Qué significan los resultados? ¿Qué se puede concluir de los resultados? ¿Qué recomendaciones puedo hacer? A pesar de que un artículo de revisión tiene una finalidad diferente a un trabajo de investigación, un artículo de revisión bien escrito también cuenta una historia, respondiendo a preguntas similares: ¿Por qué es importante revisar el tema? ¿Qué aspecto específico del tema necesita una nueva mirada? ¿Cómo puedo realizar la revisión de la literatura? ¿Qué hizo la literatura mostrar, y qué significa? ¿Qué puedo deducir de mi revisión? ¿Qué recomendaciones puedo hacer? Si usted tiene estas preguntas en mente al escribir un artículo de revisión, debe finalizar con un producto que agregue valor al campo.

---

**Contribuciones de autor:** todos los autores confirmaron que han contribuido al contenido intelectual de este escrito y han concluido los siguientes 3 requerimientos: (a) contribuciones significativas para la concepción y el diseño, adquisición de datos, o análisis e interpretación de datos; (b) la revisión y la edición del artículo para el contenido intelectual; y (c) aprobación final del artículo publicado.

**Revelaciones de los autores o de posibles conflictos de interés:** En relación con la relación del manuscrito, todos los autores elaboraron la forma de posibles conflictos de interés. Potenciales conflictos de interés:

**Empleo o liderazgo:** T.A. Annesley, *Clinical Chemistry*, AACCC.

**Papel de consultor o asesor:** Ninguno declarado.

**Propiedad participada:** Ninguno declarado.

**Honorarios:** Ninguno declarado.

**Fondos de la investigación:** Ninguno declarado.

**Testimonio experto:** Ninguno declarado.

**Papel del patrocinador:** Las organizaciones patrocinadoras no tuvieron ningún papel en el diseño del estudio, elección de los pacientes reclutados, la revisión y la interpretación de datos, o la preparación o aprobación del manuscrito.

**Reconocimientos:** Porciones de este artículo están basadas en los materiales instruccionales desarrollados por uno de nosotros (P.A. Derish) junto con Stephen Ordway, Editor en Jefe, Gladstone Institutes, y la fallecida Susan Eastwood, Editora Emérito en el Departamento de Cirugía Neurológica en la Universidad de California, San Francisco (University of California, San Francisco).

## Referencias

1. Mulrow CD. The medical review article: state of the science. *Ann Intern Med* 1987;106:485–8.
2. Mulrow CD. Rationale for systematic reviews. In: I Chalmers, DG Altman eds. *Systematic reviews*. London: BMJ; 1995. p 1–8.
3. Mulrow CD, Cook DJ, Davidoff F. Systematic reviews: critical links in the great chain of evidence [Editorial]. *Ann Intern Med* 1997;126:389–91.
4. Moher D, Cook DJ, Eastwood S, Olkin I, Rennie D, Stroup DF, for the QUOROM group. Improving the quality of reports of meta-analysis of randomized controlled trials: the QUOROM statement. *Lancet* 1999;354:1896–900.
5. Liberati A, Altman DG, Tetzlaff J, Mulrow C, Gøtzsche PC, Ioannidis JP, et al. The PRISMA statement for reporting systematic reviews and meta-analyses of studies that evaluate health care interventions: explanation and elaboration. *Ann Intern Med* 2009;151:W65–94.
6. Iverson C, Christiansen S, Fontanarosa PB, Glass RM, Gregoline B, Lurie SJ, et al. *AMA manual of style: a guide for authors and editors*. 10th ed. New York: Oxford University Press; 2007. See p 23.
7. Vercueil L, Krack P, Pollak P. Results of deep brain stimulation for dystonia: a critical reappraisal. *Mov Disord* 2002;17(Suppl 3):S89–93. See p S89.
8. de Bie RM, de Haan RJ, Schuurman PR, Esselink RA, Bosch DA, Speelamn JD. Morbidity and mortality following pallidotomy in Parkinson's disease: a systematic review. *Neurology* 2002;58:1008–12. See p 1008.
9. Volberding PA, Deeks SG. Antiretroviral therapy and management of HIV infection. *Lancet* 2010;376:49–62. See p 51.
10. Dauber A, Kellogg M, Majzoub JA. Monitoring of therapy in congenital adrenal hyperplasia. *Clin Chem* 2010;56:1245–51. See p 1248–9.
11. Clerico A, Emdin M. Diagnostic accuracy and prognostic relevance of the measurement of cardiac natriuretic peptides: a review. *Clin Chem* 2004;50:33–50. See p 43–4.
12. Makawita S, Diamandis EP. The bottleneck in the cancer biomarker pipeline and protein quantification through mass spectrometry-based approaches: current strategies for candidate verification. *Clin Chem* 2010;56:212–22. See p 221.
13. Saenger A, Christenson RH. Stroke biomarkers: progress and challenges for diagnosis, prognosis, differentiation, and treatment. *Clin Chem* 2010;56:21–33. See p 30–1.
